# Supplementary material for: Capsaicin Inhibits Inflammation and Gastric Damage during H pylori Infection by Targeting NF-kB–miRNA Axis
Source: MDPI journal article supplement (doi:10.3390/pathogens11060641), 2022-06-01
Supplement: s1 [file s1]

### Supplementary

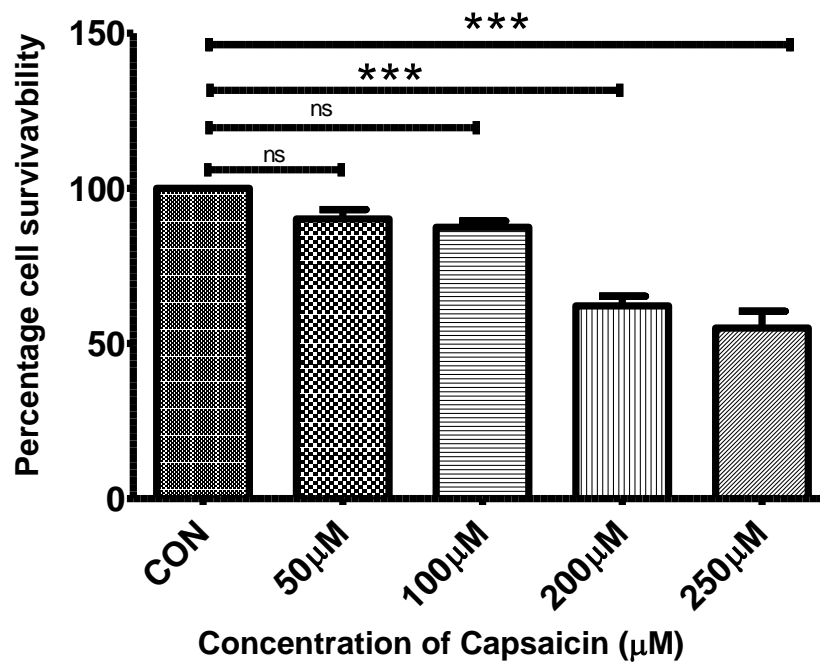

**Figure S1: Viability assay of Capsaicin.** Capsaicin was applied to AGS cells at different concentrations (50 $\mu\text{M}$ , 100 $\mu\text{M}$ , 200 $\mu\text{M}$ , 250 $\mu\text{M}$ ) and percentage cell survivability was calculated. Data is represented as mean  $\pm$  SEM. Values as tested by ANOVA followed by Tukey's post hoc test. '\*', '\*\*', '\*\*\*'; represents significant difference between groups at  $p < 0.05$ ,  $p < 0.01$ ,  $p < 0.001$  respectively. Experiments were performed in triplicates. Non-significant difference is represented as ns.

**Table S1: List of Anti-bodies utilized.**

| Antibody           | Company and Catalogue number          |
|--------------------|---------------------------------------|
| NF- $\kappa$ B p65 | Santa Cruz (F-6), sc8008, Lot# C2619  |
| Akt 1/2/3          | Abcam, ab12681, Lot: GR8432           |
| P-Akt              | Abcam, ab81283, Lot: GR2400           |
| P-NF- $\kappa$ B   | Cell Signaling, CS#3033, Ser536, 93HI |
| $\alpha$ -Tubulin  | BioBharti, #BB-ab0113                 |
| E-Cadherin         | GeneTex, GTX629                       |
| CagA               | Santa Cruz, sc-28368, Lot# F1421      |
| $\beta$ -actin     | Santa Cruz, sc-47778, Lot# C1921      |

**Table S2: List of Primers utilized.**

| Gene                    | Forward Primer               | Reverse Primer                |
|-------------------------|------------------------------|-------------------------------|
| GAPDH<br>(Mouse)        | 5'-GATCTTCGACAAGGGAGCTAAA-3' | 5'-TCGCATTCTTCTACACGATAACA-3' |
| IL-6<br>(Mouse)         | 5'-GATAAGCTGGAGTCACAGAAGG-3' | 5'-TTGCCGAGTAGATCTCAAAGTG-3'  |
| IL-1 $\beta$<br>(Mouse) | 5'-GGTGTGTGACGTTCCCATTA-3'   | 5'-TCGCATTCTTCTACACGATAACA-3' |

|                              |                                                                                                               |                                                                                                         |
|------------------------------|---------------------------------------------------------------------------------------------------------------|---------------------------------------------------------------------------------------------------------|
| TNF $\alpha$<br>(Mouse)      | 5'-CTGAGTTCTGCAAAGGGAGAG-3'                                                                                   | 5'- CCTCAGGGAAGAATCTGGAAAG -3'                                                                          |
| IL-10<br>(Mouse)             | 5'-GGGGTCATGGTGAGCACTAC-3'                                                                                    | 5'-TGGGGGAAGTGGGTAAGAGT -3'                                                                             |
| NLRP3<br>(Mouse)             | 5'-TCGGCCTTCTTCTTGTTCTG -3'                                                                                   | 5'-GTTGTTCCACATCTCTCCTAGTT-3'                                                                           |
| MsmiR21                      | Stem loop –<br>5'-GCCTAGCTTATCAGACTGA-3'<br><br>5'-GTCGTATCCAGTGCAGGGTCCGAGG<br>TATTCGCACTGGATACGACTCAACAT-3' | Stem loop –<br>5'-GTGTCGTGGAGTCGGCAA-3'<br><br>Universal Reverse Primer<br>5'-GCCTAGCTTATCAGACTGA-3'    |
| MsmiR223                     | Stem loop –<br>5'-TGGCTGTCAGTTTGTCAAAT-3'<br><br>5'-GTCGTATCCAGTGCAGGGTCCGAGG<br>TATTCGCACTGGATACGACTGGGGT-3' | Stem loop –<br>5'-GTGTCGTGGAGTCGGCAA-3'<br><br>Universal Reverse Primer<br>5'-GCCTAGCTTATCAGACTGA-3'    |
| MsmiRU6                      | Stem loop<br>5'-GCCAGCACATATACTAAAAT-3'<br><br>5'-CGCTTCACGAATTTGCGTGTCAT-3'                                  | Stem loop<br>5'-CGCTTCACGAATTTGCGTGTCAT-3'<br><br>Universal Reverse Primer<br>5'-GCCTAGCTTATCAGACTGA-3' |
| <i>H. pylori</i><br>16S rDNA | 5'-AGAGAAGCAATACTGTGAA-3'                                                                                     | 5'-CGATTACTAGCGATTCCA-3'                                                                                |
